# Supplementary material for: Effective Preparation of [18F]Flumazenil Using Copper-Mediated Late-Stage Radiofluorination of a Stannyl Precursor
Source: MDPI journal article supplement (doi:10.3390/molecules27185931), 2022-09-13
Supplement: s1 [file s1]

# Effective preparation of [ $^{18}\text{F}$ ]Flumazenil using copper mediated late stage radiofluorination of a stannyl precursor

Mohammad B. Haskali <sup>1,2\*</sup>, Peter D. Roselt <sup>2</sup>, Terence J O'Brien<sup>3</sup>, Craig A. Hutton <sup>4,5</sup>, Idrish Ali <sup>3</sup>, Lucy Vivash <sup>3</sup>, Bianca Jupp <sup>3</sup>

- 1 Sir Peter MacCallum Department of Oncology, The University of Melbourne, Melbourne, VIC 3010, Australia
  - 2 The Radiopharmaceutical Research Laboratory, The Peter MacCallum Cancer Centre, Melbourne, VIC 3000, Australia; peter.roselt@petermac.org
  - 3 Department of Neuroscience, Central Clinical School, Monash University, Melbourne, VIC 3004, Australia; Terence.O'Brien@monash.edu (T.J.O.); idrish.ali@monash.edu (I.A.); lucy.vivash@monash.edu (L.V.); bianca.jupp@monash.edu (B.J.)
  - 4 School of Chemistry, The University of Melbourne, Melbourne, VIC 3010, Australia; chutton@unimelb.edu.au
  - 5 Bio21 Molecular Science and Biotechnology Institute, The University of Melbourne, Melbourne, VIC 3010, Australia
- \* Correspondence: mo.haskali@petermac.org; Tel.: +61-(3)-8559-6913

# <sup>1</sup>H NMR Spectrum of stannyl-mazenil 3

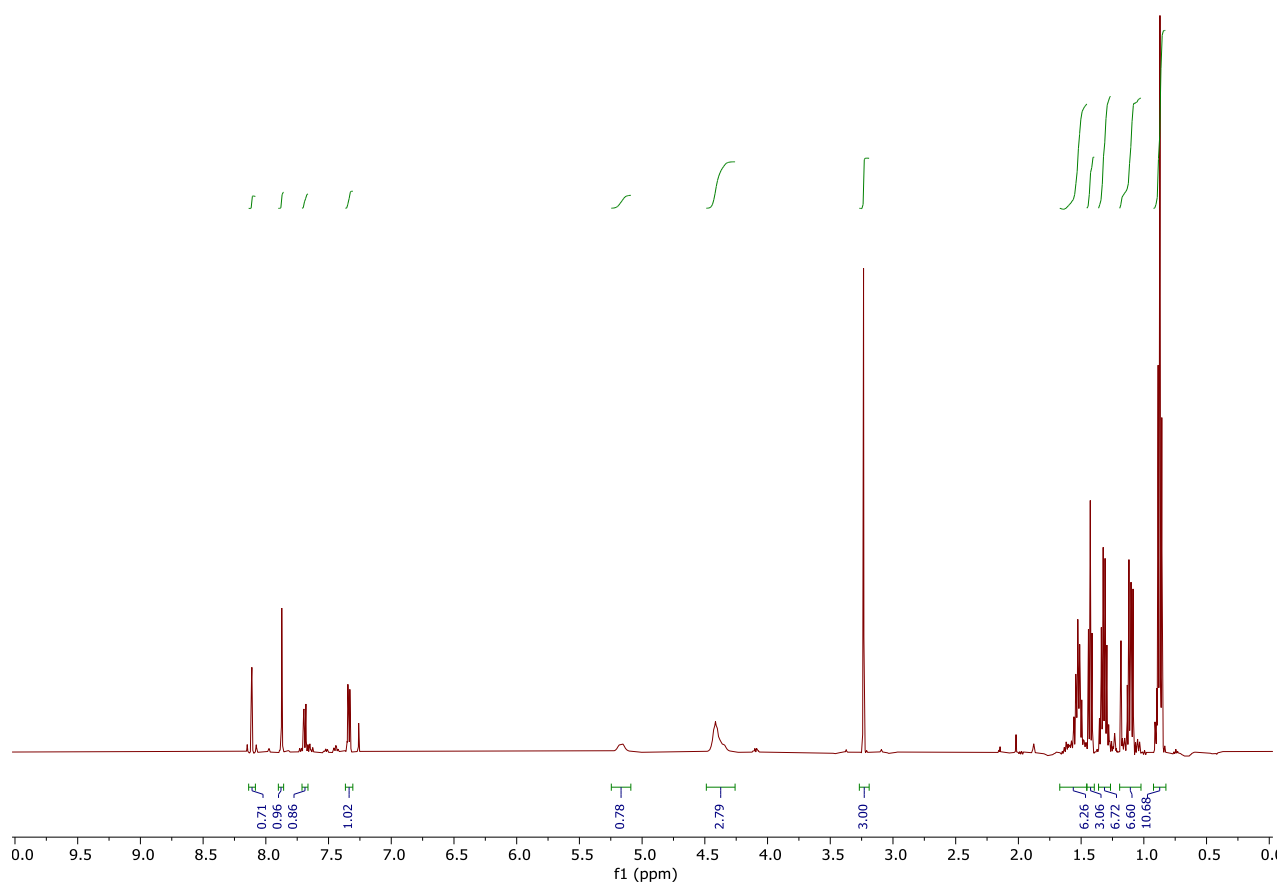

### MS Analysis of flumazenil 1

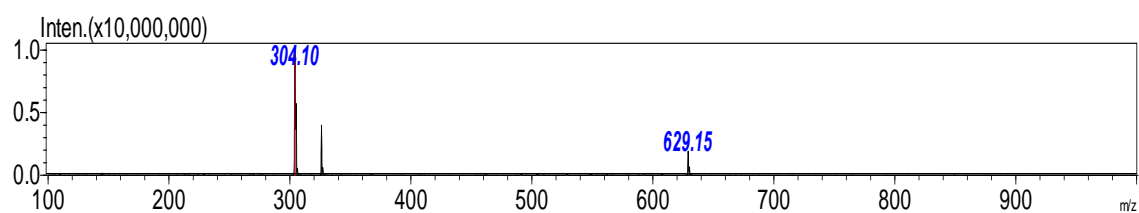

### MS Analysis of stannyl-mazenil 3

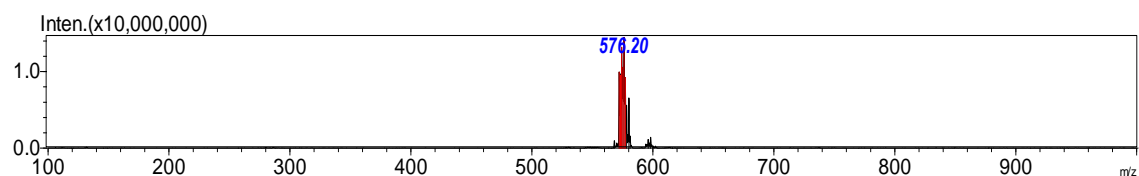

### MS Analysis of hydroxy-mazenil 4

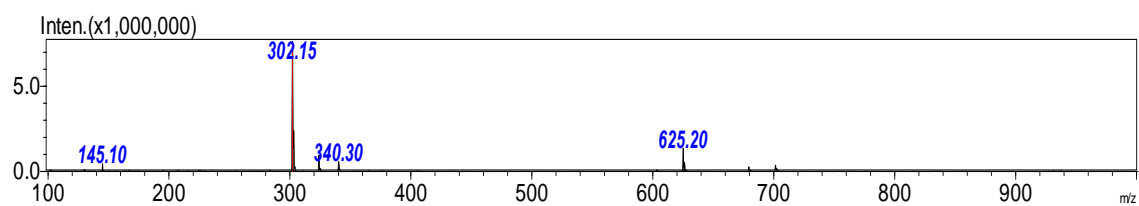

### MS Analysis of des-fluoro-flumazenil 5

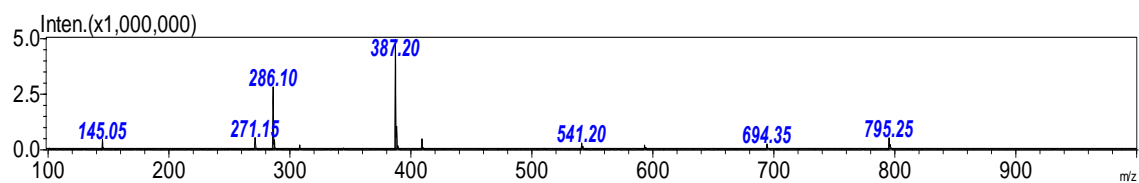

### MS Analysis of dimeric-mazenil 6

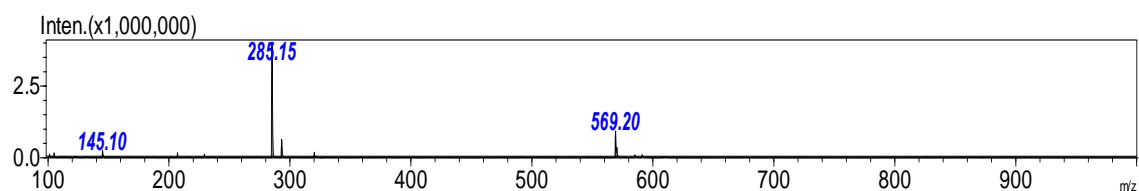

### MS-MS of Flumazenil 1; fragmentation of M+H ion at $m/z$ 304

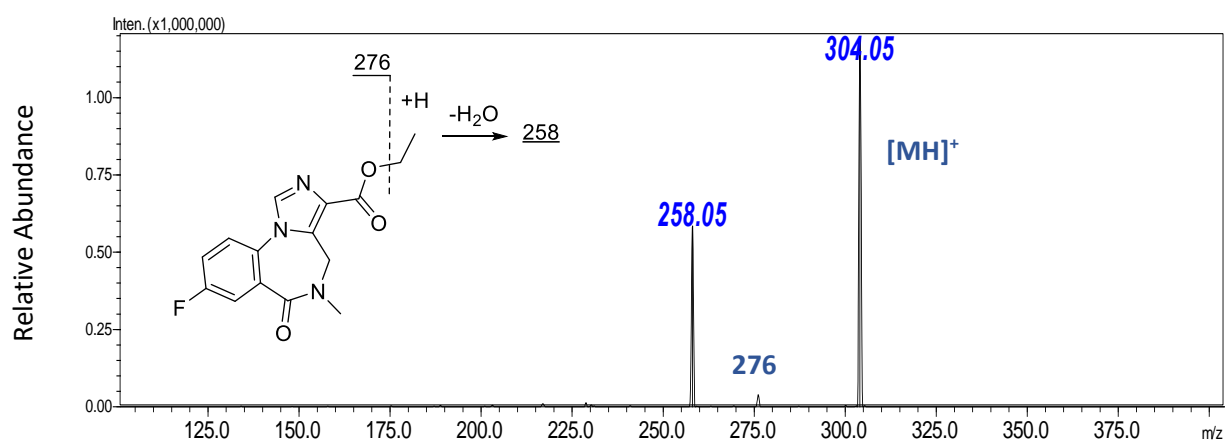

Fragmentation profile at collision energy 10 eV

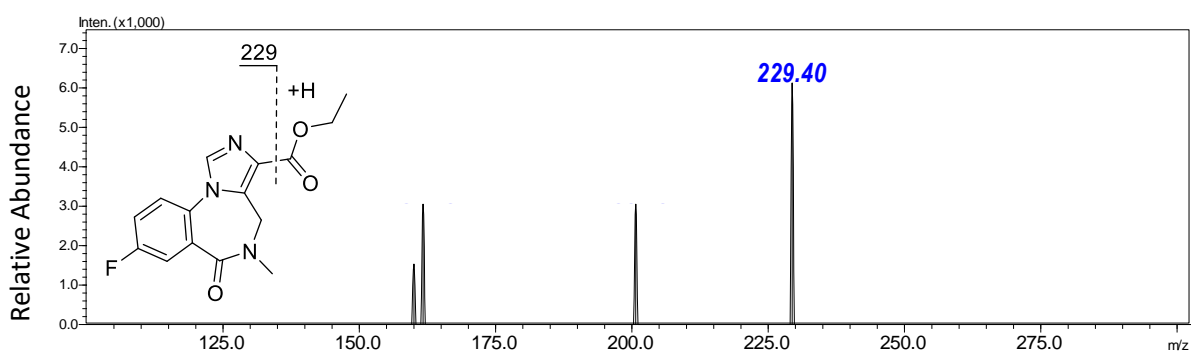

Fragmentation profile at collision energy 35 eV

### MS-MS of desfluoro-flumazenil 5; fragmentation of M+H ion at $m/z$ 286

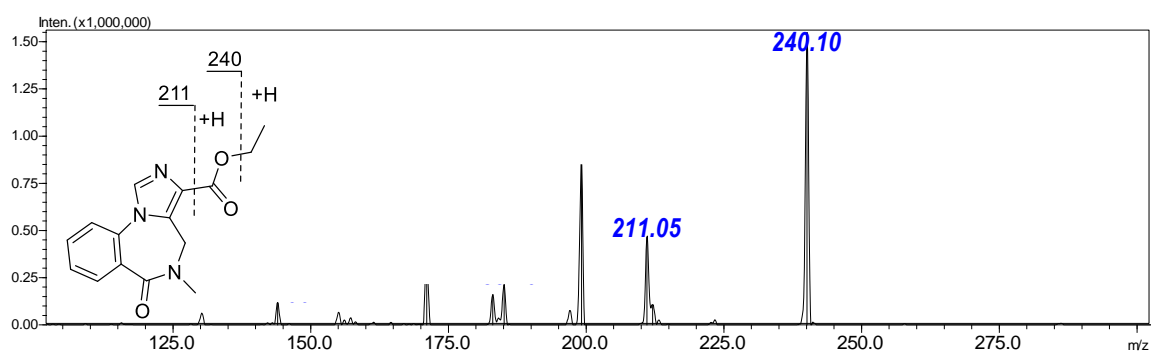

Fragmentation profile at collision energy 10 eV

# MS-MS of hydroxyl-mazenil 4; fragmentation of M+H ion at $m/z$ 302

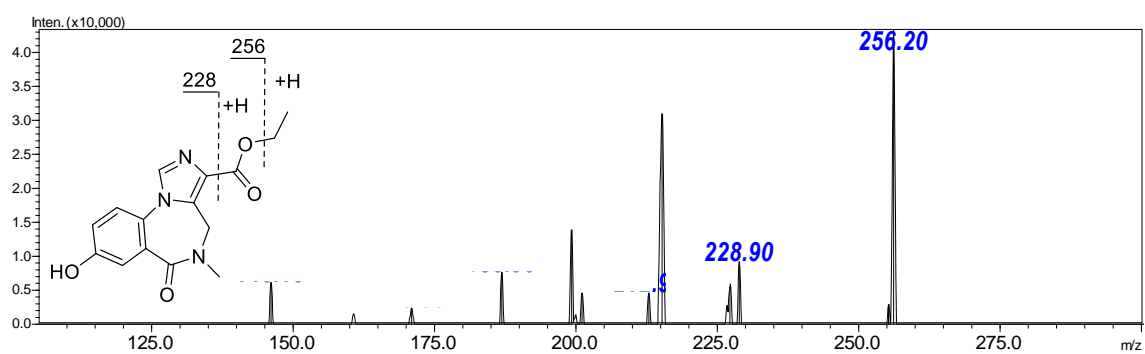

Fragmentation profile at collision energy 10 ev

### HPLC chromatogram of purified [ $^{18}\text{F}$ ]FMZ 1

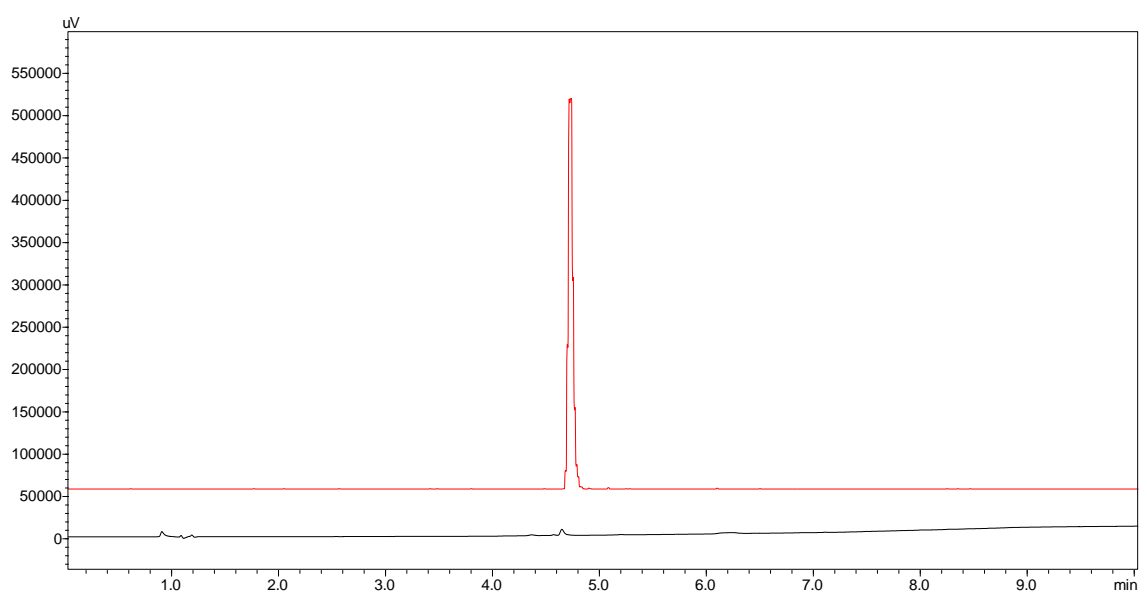

HPLC analysis performed on Kinetex 5  $\mu\text{m}$  XB-C18 4.6 x 150 mm column, 0.1% TFA in 15–90% MeCN:H<sub>2</sub>O over 7 min.

### [ $^{18}\text{F}$ ]FMZ 1 co-injected with reference standard

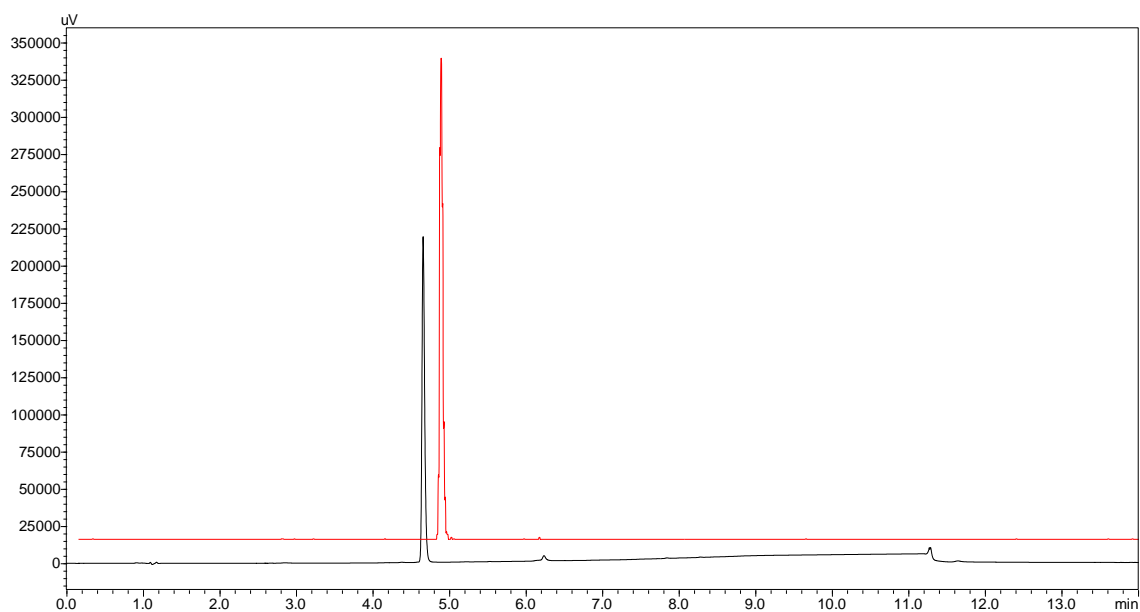

HPLC analysis performed on Kinetex 5  $\mu\text{m}$  XB-C18 4.6 x 150 mm column, 0.1% TFA in 15–90% MeCN:H<sub>2</sub>O over 7 min.

## FMZ 1 Calibration curve

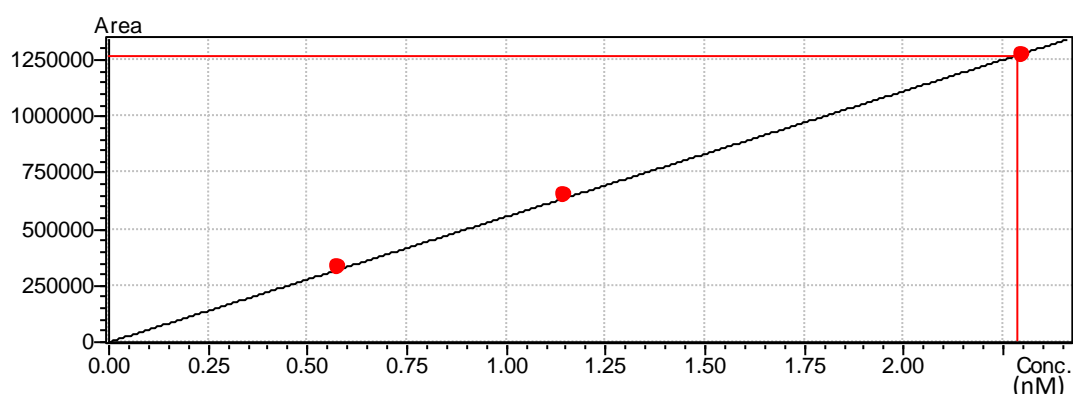

### Calibration Information - Compound ID# 1

Compound ID#: 1

Final Column Display: ☒ Area/Height ☐ File Name

Curve Fit Type: Linear

R = 0.9999384

R<sup>2</sup> = 0.9998767

RSS = 2.412432e+008

%RSD = 1.492423

Y = (556684)X + (0)

Date Processed: 10/02/2021 1:25:22 PM

| Level | Cal. Point                          | Average | # of Reps. | Area 1  |
|-------|-------------------------------------|---------|------------|---------|
| 1     | <input checked="" type="checkbox"/> | 328255  | 1          | 328255  |
| 2     | <input checked="" type="checkbox"/> | 651778  | 1          | 651778  |
| 3     | <input checked="" type="checkbox"/> | 1272810 | 1          | 1272810 |

### [<sup>18</sup>F]FMZ Automated Production Recipe

| Step | Step Message                                                | Step Condition | Step Time (seconds) | V01 (0=off, 1=on) | V02 (0=off, 1=on) | V03 (0=off, 1=on) | V04 (0=off, 1=on) | V05 (0=off, 1=on) | V06 (0=off, 1=on) | V07 (0=off, 1=on) | V08 (0=off, 1=on) | V09 (0=off, 1=on) | V10 (0=off, 1=on) | V11 (0=off, 1=on) | V12 (0=off, 1=on) | V13 (0=off, 1=on) | V14 (0=off, 1=on) |
|------|-------------------------------------------------------------|----------------|---------------------|-------------------|-------------------|-------------------|-------------------|-------------------|-------------------|-------------------|-------------------|-------------------|-------------------|-------------------|-------------------|-------------------|-------------------|
| 1    | Load KHCO3(2 mg in 0.1mL Water), MeCN (0.9mL), K222         | 0              | 0                   | 0                 | 0                 | 0                 | 0                 | 0                 | 0                 | 0                 | 0                 | 0                 | 0                 | 0                 | 0                 | 0                 | 0                 |
| 2    | Load FMZ precursor and Pyridine/Cu in DMA (1mL) into vial 4 | 0              | 0                   | 0                 | 0                 | 0                 | 0                 | 0                 | 0                 | 0                 | 0                 | 0                 | 0                 | 0                 | 0                 | 0                 | 0                 |
| 3    | Load 0.1% TFA in H2O:MeCN (60:40, 3mL) into vial 6          | 0              | 0                   | 0                 | 0                 | 0                 | 0                 | 0                 | 0                 | 0                 | 0                 | 0                 | 0                 | 0                 | 0                 | 0                 | 0                 |
| 4    | Load Saline (5mL) into vial 10                              | 0              | 0                   | 0                 | 0                 | 0                 | 0                 | 0                 | 0                 | 0                 | 0                 | 0                 | 0                 | 0                 | 0                 | 0                 | 0                 |
| 5    | Load Ethanol (1mL) into vial 9                              | 0              | 0                   | 0                 | 0                 | 0                 | 0                 | 0                 | 0                 | 0                 | 0                 | 0                 | 0                 | 0                 | 0                 | 0                 | 0                 |
| 5    | Load saline (10mL) into vial 8                              | 0              | 0                   | 0                 | 0                 | 0                 | 0                 | 0                 | 0                 | 0                 | 0                 | 0                 | 0                 | 0                 | 0                 | 0                 | 0                 |
| 7    | Load Water (30ml) into HPLC Flask 1                         | 0              | 0                   | 0                 | 0                 | 0                 | 0                 | 0                 | 0                 | 0                 | 0                 | 0                 | 0                 | 0                 | 0                 | 0                 | 0                 |
| 8    | Pressurize Reactor 1                                        | 0              | 6                   | 0                 | 0                 | 0                 | 0                 | 0                 | 0                 | 0                 | 0                 | 0                 | 0                 | 0                 | 0                 | 0                 | 0                 |
| 9    | Waiting for pressure leak in Reactor 1                      | 0              | 9                   | 0                 | 0                 | 0                 | 0                 | 0                 | 0                 | 0                 | 0                 | 0                 | 0                 | 0                 | 0                 | 0                 | 0                 |
| 10   | Pressure testing Reactor 1                                  | 20             | 1                   | 0                 | 0                 | 0                 | 0                 | 0                 | 0                 | 0                 | 0                 | 0                 | 0                 | 0                 | 0                 | 0                 | 0                 |
| 11   | Install conditioned QMA cartridge at position QMA           | 0              | 0                   | 0                 | 0                 | 0                 | 0                 | 0                 | 0                 | 0                 | 0                 | 0                 | 0                 | 0                 | 0                 | 0                 | 0                 |
| 12   | Install conditioned C-18 cartridge at position SPE B        | 0              | 0                   | 0                 | 0                 | 0                 | 0                 | 0                 | 0                 | 0                 | 0                 | 0                 | 0                 | 0                 | 0                 | 0                 | 0                 |
| 13   | Check HPLC Eluent A = 0.1% TFA in water                     | 0              | 0                   | 0                 | 0                 | 0                 | 0                 | 0                 | 0                 | 0                 | 0                 | 0                 | 0                 | 0                 | 0                 | 0                 | 0                 |
| 14   | Check HPLC Eluent B = 0.1% TFA in MeCN                      | 0              | 0                   | 0                 | 0                 | 0                 | 0                 | 0                 | 0                 | 0                 | 0                 | 0                 | 0                 | 0                 | 0                 | 0                 | 0                 |
| 15   | Connect final product collection vial                       | 0              | 0                   | 0                 | 0                 | 0                 | 0                 | 0                 | 0                 | 0                 | 0                 | 0                 | 0                 | 0                 | 0                 | 0                 | 0                 |
| 16   | Pressurize reagent vials                                    | 0              | 9                   | 0                 | 0                 | 0                 | 0                 | 0                 | 0                 | 0                 | 0                 | 0                 | 0                 | 0                 | 0                 | 0                 | 0                 |
| 17   | Waiting for pressure leak in reagent vials                  | 0              | 9                   | 0                 | 0                 | 0                 | 0                 | 0                 | 0                 | 0                 | 0                 | 0                 | 0                 | 0                 | 0                 | 0                 | 0                 |
| 18   | Pressure testing reagent vials                              | 22             | 1                   | 0                 | 0                 | 0                 | 0                 | 0                 | 0                 | 0                 | 0                 | 0                 | 0                 | 0                 | 0                 | 0                 | 0                 |
| 19   | Ready for F- from cyclotron - Press NEXT when transferred   | 1              | 0                   | 0                 | 0                 | 0                 | 0                 | 0                 | 0                 | 0                 | 0                 | 0                 | 0                 | 0                 | 0                 | 0                 | 0                 |
| 20   | Trapping F- onto QMA cartridge                              | 0              | 60                  | 0                 | 0                 | 0                 | 0                 | 0                 | 0                 | 0                 | 0                 | 0                 | 0                 | 0                 | 0                 | 1                 | 1                 |
| 21   | Elution of QMA cartridge into Reactor 1                     | 0              | 60                  | 1                 | 0                 | 0                 | 0                 | 0                 | 0                 | 0                 | 0                 | 0                 | 0                 | 0                 | 0                 | 0                 | 0                 |
| 22   | Recording activity in Reactor for RCY                       | 5              | 2                   | 1                 | 0                 | 0                 | 0                 | 0                 | 0                 | 0                 | 0                 | 0                 | 0                 | 0                 | 0                 | 0                 | 0                 |
| 24   | MeCN for azeotropic drying                                  | 0              | 60                  | 0                 | 1                 | 0                 | 0                 | 0                 | 0                 | 0                 | 0                 | 0                 | 0                 | 0                 | 0                 | 0                 | 0                 |
| 24   | Drying fluoride (gas + vacuum)                              | 0              | 340                 | 0                 | 0                 | 0                 | 0                 | 0                 | 0                 | 0                 | 0                 | 0                 | 0                 | 0                 | 0                 | 0                 | 0                 |
| 25   | Drying fluoride (vacuum only)                               | 0              | 120                 | 0                 | 0                 | 0                 | 0                 | 0                 | 0                 | 0                 | 0                 | 0                 | 0                 | 0                 | 0                 | 0                 | 0                 |
| 26   | Cooling Reactor 1                                           | 12             | 400                 | 0                 | 0                 | 0                 | 0                 | 0                 | 0                 | 0                 | 0                 | 0                 | 0                 | 0                 | 0                 | 0                 | 0                 |
| 27   | Addition of precursor in tBuOH-MeCN (vial 3) to Reactor 1   | 0              | 25                  | 0                 | 0                 | 0                 | 1                 | 0                 | 0                 | 0                 | 0                 | 0                 | 0                 | 0                 | 0                 | 0                 | 0                 |
| 28   | Reaction at 140C for 20min                                  | 0              | 600                 | 0                 | 0                 | 0                 | 0                 | 0                 | 0                 | 0                 | 0                 | 0                 | 0                 | 0                 | 0                 | 0                 | 0                 |
| 29   | Cooling Reactor 1                                           | 12             | 400                 | 0                 | 0                 | 0                 | 0                 | 0                 | 0                 | 0                 | 0                 | 0                 | 0                 | 0                 | 0                 | 0                 | 0                 |
| 30   | Transferring Reactor 1 to Intermediate Vial 1               | 0              | 45                  | 0                 | 0                 | 0                 | 0                 | 0                 | 0                 | 0                 | 0                 | 0                 | 0                 | 0                 | 0                 | 0                 | 0                 |
| 31   | Addition of 0.1%TFA water (vial 6) to Reactor 1             | 0              | 30                  | 0                 | 0                 | 0                 | 0                 | 1                 | 0                 | 0                 | 0                 | 0                 | 0                 | 0                 | 0                 | 0                 | 0                 |
| 32   | Pressurize gas lines                                        | 0              | 2                   | 0                 | 0                 | 0                 | 0                 | 0                 | 0                 | 0                 | 0                 | 0                 | 0                 | 0                 | 0                 | 0                 | 0                 |
| 33   | Transferring Reactor 1 to Intermediate Vial 1               | 0              | 45                  | 0                 | 0                 | 0                 | 0                 | 0                 | 0                 | 0                 | 0                 | 0                 | 0                 | 0                 | 0                 | 0                 | 0                 |
| 34   | Injecting into HPLC loop - Waiting for fluid detector 1 ON  | 30             | 60                  | 0                 | 0                 | 0                 | 0                 | 0                 | 0                 | 0                 | 0                 | 1                 | 0                 | 0                 | 0                 | 0                 | 0                 |
| 35   | Injecting into HPLC loop - Waiting for fluid detector 1 OFF | 32             | 60                  | 0                 | 0                 | 0                 | 0                 | 0                 | 0                 | 0                 | 0                 | 1                 | 0                 | 0                 | 0                 | 0                 | 0                 |
| 36   | HPLC purification of [18F]FBR (40min gradient to 5%A 95%B)  | 0              | 0                   | 0                 | 0                 | 0                 | 0                 | 0                 | 0                 | 0                 | 0                 | 0                 | 0                 | 0                 | 0                 | 0                 | 0                 |
| 37   | Collecting product peak into HPLC Flask 1 - Click NEXT to   | 0              | 0                   | 0                 | 0                 | 0                 | 0                 | 0                 | 0                 | 0                 | 0                 | 0                 | 0                 | 0                 | 0                 | 0                 | 0                 |
| 38   | Trapping purified [18F]FBR onto C-18 at SPE-B               | 0              | 200                 | 0                 | 0                 | 0                 | 0                 | 0                 | 0                 | 0                 | 0                 | 0                 | 0                 | 1                 | 0                 | 0                 | 0                 |
| 39   | Washing FMZ with Saline                                     | 0              | 60                  | 0                 | 0                 | 0                 | 0                 | 0                 | 0                 | 0                 | 0                 | 0                 | 1                 | 0                 | 0                 | 0                 | 0                 |
| 40   | Elution of FMZ into dose vial                               | 0              | 40                  | 0                 | 0                 | 0                 | 0                 | 0                 | 0                 | 0                 | 1                 | 0                 | 0                 | 0                 | 0                 | 0                 | 0                 |
| 41   | Dilution with 10 ml saline                                  | 0              | 100                 | 0                 | 0                 | 0                 | 0                 | 0                 | 0                 | 1                 | 0                 | 0                 | 0                 | 0                 | 0                 | 0                 | 0                 |
| 42   | Recording activity in Final Product Vial for RCY            | 6              | 2                   | 0                 | 0                 | 0                 | 0                 | 0                 | 0                 | 1                 | 0                 | 0                 | 0                 | 0                 | 0                 | 0                 | 0                 |
| 43   | Transfer of final product vial out                          | 0              | 250                 | 0                 | 0                 | 0                 | 0                 | 0                 | 0                 | 0                 | 0                 | 0                 | 0                 | 0                 | 0                 | 0                 | 0                 |
| 44   | Stopping HPLC 2                                             | 0              | 2                   | 0                 | 0                 | 0                 | 0                 | 0                 | 0                 | 0                 | 0                 | 0                 | 0                 | 0                 | 0                 | 0                 | 0                 |
| 45   | End of synthesis - Click ABORT to finish                    | 2              | 0                   | 0                 | 0                 | 0                 | 0                 | 0                 | 0                 | 0                 | 0                 | 0                 | 0                 | 0                 | 0                 | 0                 | 0                 |



### [<sup>18</sup>F]FMZ Automated Production Recipe Continued

[illegible]
